# Supplementary material for: The Mutation Glu151Asp in the B-Component of the Bacillus cereus Non-Hemolytic Enterotoxin (Nhe) Leads to a Diverging Reactivity in Antibody-Based Detection Systems
Source: PubMed Central journal article supplement (PMC4663526; doi:10.3390/toxins7114655), 2015-11-09
Supplement: toxins-07-04655-s001.pdf [file toxins-07-04655-s001.pdf]

# Supplementary Information

|         | 10                                                            | 20  | 30  | 40  | 50  | 60  |
|---------|---------------------------------------------------------------|-----|-----|-----|-----|-----|
| MHI241  | AESTVKQAPVHAVAKAYNDYEEYSLGPEGLKDAMERTGSNALVMDLYALTIIKQGNVNF   |     |     |     |     |     |
| MHI3178 | AESTVKQAPVHAVAKAYNDYEEYSLGPEGLKDAMERTGSNALVMDLYALTIIKQGNVNF   |     |     |     |     |     |
| MHI1440 | AESTVKQAPVHAAAKAYNDYEEYSLGPEGLKDAMERTGSNALVMDLYALTIIKQGNVNF   |     |     |     |     |     |
| MHI1541 | AESTVKQAPVHAVAKAYNDYEEYSLGPEGLKDAMERTGSNALVMDLYALTIIKQGSVNF   |     |     |     |     |     |
| MHI1668 | AESTVKQAPVHAAAKAYNDYEEYSLGPEGLKDAMERTGSNALVMDLYALTIIKQGNVNF   |     |     |     |     |     |
| MHI2970 | AESTVKQAPVHAAAKAYNDYEEYSLGPEGLKDAMERTGSNALVMDLYALTIIKQGNVNF   |     |     |     |     |     |
| MHI3173 | AESTVKQAPVHAAAKAYNDYEEYSLGPEGLKDAMERTGSNALVMDLYALTIIKQGNVNF   |     |     |     |     |     |
| MHI3225 | AESTVNQAPVHAVTKASNDDQEYSLRTRDLNHHAMEIKSSDVLVLDLYTL-----       |     |     |     |     |     |
| MHI1430 | AESTVKQAPVHAVAKAYNDYEEYSLGPEGLKDAMERTGSNALVMDLYALTIIKQGNVNF   |     |     |     |     |     |
| MHI1444 | AESTVKQAPVHAVAKAYNDYEEYSLGPEGLKDAMERTGSNALVMDLYALTIIKQGNVNF   |     |     |     |     |     |
| MHI1758 | AESTVKQAPVHAVAKAYNDYDEYSLGPEGLKDAMERTGSNALVMDLYALTIIKQGNVNF   |     |     |     |     |     |
| N5      | -----                                                         |     |     |     |     |     |
|         | 70                                                            | 80  | 90  | 100 | 110 | 120 |
| MHI241  | NVSSVDAALKGKVIQHQDTARGNAKQWLDVLPQLISTNQNIINYN TKFQNYD TLVAAV  |     |     |     |     |     |
| MHI3178 | NVSSVDAALKGKVIQHQDTARGNAKQWLDVLPQLISTNQNIINYN TKFQNYD TLVAAV  |     |     |     |     |     |
| MHI1440 | NVSSVDAALKGKVIQHQDTARGNAKQWLDVLPQLISTNQNIINYN TKFQNYD TLVAAV  |     |     |     |     |     |
| MHI1541 | NVSSVDAALKGKVIQHQDTARGNAKQWLDVLPQLISTNQNIINYN TKFQNYD TLVAAV  |     |     |     |     |     |
| MHI1668 | NVSSVDAALKGKVIQHQDTARGNAKQWLDVLPQLISTNQNIINYN TKFQNYD TLVAAV  |     |     |     |     |     |
| MHI2970 | NVSSVDAALKGKVIQHQDTARGNAKQWLDVLPQLISTNQNIINYN TKFQNYD TLVAAV  |     |     |     |     |     |
| MHI3173 | NVSSVDAALKGKVIQHQDTARGNAKQWLDVLPQLISTNQNIINYN TKFQNYD TLVAAV  |     |     |     |     |     |
| MHI3225 | -----NAKQWLDVLPQLISTNQNIINYN TKFQNYD TLVAAV                   |     |     |     |     |     |
| MHI1430 | NVSSVDAALKGKVIQHQDTARGNAKQWLDVLPQLISTNQNIINYN TKFQNYD TLVAAV  |     |     |     |     |     |
| MHI1444 | NVSSVDAALKGKVIQHQDTARGNAKQWLDVLPQLISTNQNIINYN TKFQNYD TLVAAV  |     |     |     |     |     |
| MHI1758 | NVTSVD TSLKGKVIQHQDTARGNAQWLDVLPQLISTNQNIINYN TKFQNYD TLVAAV  |     |     |     |     |     |
| N5      | -----                                                         |     |     |     |     |     |
|         | 130                                                           | 140 | 150 | 160 | 170 | 180 |
| MHI241  | DAKDKATLTKGLTRLSSSINENKAQVDQLVEDLKKFRNKMTSDTQNFKGDANQITSILAS  |     |     |     |     |     |
| MHI3178 | DAKDKATLTKGLTRLSSSINENKAQVDQLVEDLKKFRNKMTSDTQNFKGDANQITSILAS  |     |     |     |     |     |
| MHI1440 | DAKDKATLTKGLTRLSSSINENKTQVDQLVDDLKFRNKMTSDTQNFKGDANQITSILAS   |     |     |     |     |     |
| MHI1541 | DAKDKATLTKGLTRLSSSINENKAQVDQLVDDLKFRNKMTSDTQNFKGDANQITSILAS   |     |     |     |     |     |
| MHI1668 | DAKDKATLTKGLTRLSSSINENKAQVDQLVDDLKFRNKMTSDTQNFKGDANQITSILAS   |     |     |     |     |     |
| MHI2970 | DAKDKATLTKGLTRLSSSINENKAQVDQLVDDLKFRNKMTSDTQNFKGDANQITSILAS   |     |     |     |     |     |
| MHI3173 | DAKDKATLTKGLTRLSSSINENKAQVDQLVDDLKFRNKMTSDTQNFKGDANQITSILAS   |     |     |     |     |     |
| MHI3225 | DAKD-----TRISSSINENKAQVDQLVDDLKFR-----                        |     |     |     |     |     |
| MHI1430 | DAKDKATLTKGLTRLSSSINENKAQVDQLVEDLKKFRNKMTSDTQNFKGDANQITSILAS  |     |     |     |     |     |
| MHI1444 | DAKDKATLTKGLTRLSSSINENKAQVDQLVEDLKKFRNKMTSDTQNFKGDANQITSILAS  |     |     |     |     |     |
| MHI1758 | DAKDKATLTKGLTRLSSSI TENKAQVDKLVEDLKKFRNKMTSDTQNFKGDANQITSILAS |     |     |     |     |     |
| N5      | -----DLKKFRNKMTSDTQNFKGDANQITSILAS                            |     |     |     |     |     |
|         | 190                                                           | 200 | 210 | 220 | 230 | 240 |
| MHI241  | QDAGIPLLQNQITTYNEAISKYNAIIGSSVATALGPIAII GGAVVIATGAGTPLGVALI  |     |     |     |     |     |
| MHI3178 | QDAGIPLLQNQITTYNEAISKYNAIIGSSVATALGPIAII GGAVVIATGAGTPLGVALI  |     |     |     |     |     |
| MHI1440 | QDAGIPLLQNQITTYNEAISKYNAIIGSSVATALGPIAII GGAVVIATGAGTPLGVALI  |     |     |     |     |     |
| MHI1541 | QDAGIPLLQNQITTYNEAISKYNAIIGSSVATALGPIAII GGAVVIATGAGTPLGVALI  |     |     |     |     |     |
| MHI1668 | QDAGIPLLQNQITTYNEAISKYNAIIGSSVATALGPIAII GGAVVIATGAGTPLGVALI  |     |     |     |     |     |
| MHI2970 | QDAGIPLLQNQITTYNEAISKYNAIIGSSVATALGPIAII GGAVVIATGAGTPLGVALI  |     |     |     |     |     |
| MHI3173 | QDAGIPLLQNQITTYNEAISKYNAIIGSSVATALGPIAII GGAVVIATGAGTPLGVALI  |     |     |     |     |     |
| MHI3225 | -----IAIIGGAVVIATGAGTPLGVALI                                  |     |     |     |     |     |
| MHI1430 | QDAGIPLLQNQITTYNEAISKYNAIIGSSVATALGPIAII GGAVVIATGAGTPLGVALI  |     |     |     |     |     |
| MHI1444 | QDAGIPLLQNQITTYNEAISKYNAIIGSSVATALGPIAII GGAVVIATGAGTPLGVALI  |     |     |     |     |     |
| MHI1758 | QDAGIPLLQNQITTYNEAISKYNAIIGSSVATALGPIAII GGAVVIATGAGTPLG IALI |     |     |     |     |     |
| N5      | QDAGIPLLQNQITTYNEAISKYNAIIGSSVATALGPIAII GGAVVIATGAGTPLGVALI  |     |     |     |     |     |

Figure S1. Cont.

|          |                                                              |     |     |     |     |     |
|----------|--------------------------------------------------------------|-----|-----|-----|-----|-----|
|          | 250                                                          | 260 | 270 | 280 | 290 | 300 |
|          |                                                              |     |     |     |     |     |
| MHI241   | AGGAAAVGGGTAGIVLAKKELDNAQAEIQKITGQVTTAQLEVAGLTNIKTQTEYLTNTID |     |     |     |     |     |
| MHI3178  | AGGAAAVGGGTAGIVLAKKELDNAQAEIQKITGQVTTAQLEVAGLTNIKTQTEYLTNTID |     |     |     |     |     |
| MHI1440  | AGGAAAVGGGTAGIVLAKKELDNAQAEIQKITGQVTTAQLEVAGLTNIKTQTEYLTNTID |     |     |     |     |     |
| MHI1541  | AGGAAAVGGGTAGIVLAKKELDNAQAEIQKITGQVTTAQLEVAGLTNIKTQTEYLTNTID |     |     |     |     |     |
| MHI1668  | AGGAAAVGGGTAGIVLAKKELDNAQAEIQKITGQVTTAQLEVAGLTNIKTQTEYLTNTID |     |     |     |     |     |
| MHI2970  | AGGTAAVGGGTAGIVLAKKELDNAQAEIQKITGQVTTAQLEVAGLTNIKTQTEYLTNTID |     |     |     |     |     |
| MHI3173  | AGGAAAVGGGTAGIVLAKKELDNAQAEIQKITGQVTTAQLEVAGLTNIKTQTEYLTNTID |     |     |     |     |     |
| MHI3225  | AGGAAAVGGGTAGIVLAKKELDNAQAEIQKITGQVTTAQLEVAGLTNIKTQTEYLTNTID |     |     |     |     |     |
| MHI1430  | AGGTAAVGGGTAGIVLAKKELDNAQAEIQKITGQVTTAQLEVAGLTNIKTQTEYLTNTID |     |     |     |     |     |
| MHI1444  | AGGTAAVGGGTAGIVLAKKELDNAQAEIQKITGQVTTAQLEVAGLTNIKTQTEYLTNTID |     |     |     |     |     |
| MHI1758  | AGGTAAVGGGTAGIVLAKKELDNAQAEIQKITGQVTTAQLEVAGLTNIKTQTEYLTNTID |     |     |     |     |     |
| N5xxxx11 | AGGAAAVGGGTAGIVLAKKELDNAQAEIQKITGQVTTAQLEVAGLTNIKTQTEYLTNTID |     |     |     |     |     |

  

|          |                                                             |     |     |     |     |     |
|----------|-------------------------------------------------------------|-----|-----|-----|-----|-----|
|          | 310                                                         | 320 | 330 | 340 | 350 | 360 |
|          |                                                             |     |     |     |     |     |
| MHI241   | TAITALQNISNQWYTMGSKYNSLLQNVDSISPNDLVFIKEDLNIKDSWKNIKDYAEKIY |     |     |     |     |     |
| MHI3178  | TAITALQNISNQWYTMGSKYNSLLQNVDSISPNDLVFIKEDLNIKDSWKNIKDYAEKIY |     |     |     |     |     |
| MHI1440  | TAITALQNISNQWYTMGSKYNSLLQNVDSISPNDLVFIKEDLNIKDSWKNIKDYAEKIY |     |     |     |     |     |
| MHI1541  | TAITALQNISNQWYTMGSKYNSLLQNVDSISPNDLVFIKEDLNIKDSWKNIKDYAEKIY |     |     |     |     |     |
| MHI1668  | TAITALQNISNQWYTMGSKYNSLLQNVDSISPNDLVFIKEDLNIKDSWKNIKDYAEKIY |     |     |     |     |     |
| MHI2970  | TAITALQNISNQWYTMGSKYNSLLQNVDSISPNDLVFIKEDLNIKDSWKNIKDYAEKIY |     |     |     |     |     |
| MHI3173  | TAITALQNISNQWYTMGSKYNSLLQNVDSISPNDLVFIKEDLNIKDSWKNIKDYAEKIY |     |     |     |     |     |
| MHI3225  | TAITALQNISNQWYTMGSKYNSLLQNVDSISPNDLVFIKEDLNIKDSWKNIKDYAEKIY |     |     |     |     |     |
| MHI1430  | TAITALQNISNQWYTMGSKYNSLLQNVDSISPNDLVFIKEDLNIKDSWKNIKDYAEKIY |     |     |     |     |     |
| MHI1444  | TAITALQNISNQWYTMGSKYNSLLQNVDSISPNDLVFIKEDLNIKDSWKNIKDYAEKIY |     |     |     |     |     |
| MHI1758  | TAITALQNISNQWYTMGSKYNSLLQNVDSISPNDLVFIKEDLNIKDSWKNIKDYAEKIY |     |     |     |     |     |
| N5xxxx11 | TAITALQNISNQWYTMGSKYNSLLQNVDSISPNDLVFIKEDLNIKDSWKNIKDYAEKIY |     |     |     |     |     |

  

|          |              |
|----------|--------------|
|          | 370          |
|          |              |
| MHI241   | AEDIKVVDTKKA |
| MHI3178  | AEDIKVVDTKKA |
| MHI1440  | AEDIKVVDTKKA |
| MHI1541  | AEDIKVVDTKKA |
| MHI1668  | AEDIKVVDTKKA |
| MHI2970  | AEDIKVVDTKKA |
| MHI3173  | AEDIKVVDTKKA |
| MHI3225  | AEDIKVVDTKKA |
| MHI1430  | AEDIKVVDTKKA |
| MHI1444  | AEDIKVVDTKKA |
| MHI1758  | AEDIKVVDTKKA |
| N5xxxx11 | AEDIKVVDTKKA |

**Figure S1.** Complete sequence alignment of all strains under study.
